## Automated Isoform Diversity Detector (AIDD):

### A pipeline for investigating transcriptome diversity of RNA-seq data

Noel-Marie Plonski<sup>1,2</sup>, Emily Johnson<sup>1</sup>, Madeline Frederick<sup>1</sup>, Heather Mercer<sup>1,3</sup>, Gail Fraizer<sup>1,2</sup>, Richard Meindl<sup>2,4</sup>, Gemma Casadesus<sup>1,2,5</sup>, and Helen Piontkivska<sup>1,2,5</sup> \*

<sup>1</sup> Department of Biological Sciences, 256 Cunningham Hall, Kent State University, Kent, OH, USA 44242;

<sup>2</sup> School of Biomedical Sciences, Kent State University, PO Box 5190, Kent, OH, USA 44242;

<sup>3</sup> University of Mount Union, 1972 Clark Ave, Alliance, OH 44601;

<sup>4</sup> Department of Anthropology, Kent State University, Kent, OH, USA 44242;

<sup>5</sup> Brain Health Research Institute, Kent State University, Kent, OH, USA 44242

---

#### Abstract

*Background:* As the number of RNA-seq datasets that become available to explore transcriptome diversity increases, so does the need for easy-to-use comprehensive computational workflows. Many available tools facilitate analyses of one of the two major mechanisms of transcriptome diversity, namely, differential expression of isoforms due to alternative splicing, while the second major mechanism - RNA editing due to post-transcriptional changes of individual nucleotides – remains under-appreciated. Both these mechanisms play an essential role in physiological and diseases processes, including cancer and neurological disorders. However, elucidation of RNA editing events at transcriptome-wide level requires increasingly complex computational tools, in turn resulting in a steep entrance barrier for labs who are interested in high-throughput variant calling applications on a large scale but lack the manpower and/or computational expertise.

*Results:* Here we present an easy-to-use, fully automated, computational pipeline (Automated Isoform Diversity Detector, AIDD) that contains open source tools for various tasks needed to map transcriptome diversity, including RNA editing events. To facilitate reproducibility and avoid system dependencies, the pipeline is contained within a pre-configured VirtualBox environment.

---

\* Corresponding author. Tel.: +1-330-672-3620.

E-mail address: [opiontki@kent.edu](mailto:opiontki@kent.edu).

29 The analytical tasks and format conversions are accomplished via a set of automated scripts that  
30 enable the user to go from a set of raw data, such as fastq files, to publication-ready results and  
31 figures in one step. A publicly available dataset of Zika virus-infected neural progenitor cells is  
32 used to illustrate AIDD's capabilities.

33

34 *Conclusions:* AIDD pipeline offers a user-friendly interface for comprehensive and reproducible  
35 RNA-seq analyses. Among unique features of AIDD are its ability to infer RNA editing patterns,  
36 including ADAR editing, and inclusion of Guttman scale patterns for time series analysis of such  
37 editing landscapes. AIDD-based results show importance of diversity of ADAR isoforms, key RNA  
38 editing enzymes linked with the innate immune system and viral infections. These findings offer  
39 insights into the potential role of ADAR editing dysregulation in the disease mechanisms, including  
40 those of congenital Zika syndrome. Because of its automated all-inclusive features, AIDD pipeline  
41 enables even a novice user to easily explore common mechanisms of transcriptome diversity,  
42 including RNA editing landscapes.

43

---

44 *Keywords:* high-throughput sequencing, analysis of RNA-seq, transcriptome, editome, RNA editing, isoform,  
45 differential expression, sequencing variants, adenosine deaminases acting on RNA (ADAR)

46 **Background:**

47

48 Transcriptome complexity and diversity, including patterns of differential isoform  
49 expression, non-canonical transcripts, diversity of non-coding RNAs, and regulation of RNA  
50 editing play fundamental roles in both normal physiological function and disease mechanisms  
51 (ENCODE\_Project\_Consortium 2004; Albert and Kruglyak 2015; Ardlie and Guigo 2017; Gallo et  
52 al. 2017). Due to advances in deep sequencing technologies, RNA-seq experiments have become a  
53 more affordable and therefore popular tool for studying intricacies of molecular processes (Ozsolak  
54 and Milos 2011; Conesa et al. 2016; Wang and Ma'ayan 2016; Hasin, Seldin and Lusi 2017). In  
55 fact, currently RNA-seq can be considered almost routine if not for the still substantial costs of  
56 experiments and subsequent *in-silico* analyses (Svensson, Vento-Tormo and Teichmann 2018),  
57 including those associated with data storage and handling (Kwon et al. 2015). This, along with  
58 explosive increases in available volumes of data generated in large-scale RNA-seq experiments,  
59 contributes to an ongoing demand for universal, easy-to-use computational tools capable of user-  
60 specific customization.

61 One of the widely used workflows available for high-throughput RNA-seq analyses is  
62 Galaxy, which is a reproducible and collaborative analytic platform that offers developers a  
63 framework for integrating and sharing their tools and workflows (Goecks, Nekrutenko and Taylor  
64 2010; Afgan et al. 2016). Yet, although Galaxy is designed to be relatively easy to use, even for a  
65 beginner, performing more in depth analysis with multi-step workflows often requires that a user  
66 possesses and/or has access to a specialized bioinformatics expertise. Other challenges are related to  
67 sharing potentially large-scale analyses on a public webserver, which can become time-consuming,  
68 e.g., with time to completion increasing during high peak usage hours. Further, while there are  
69 hundreds of workflows currently accessible on Galaxy, many of these are quite complex and have a  
70 substantial learning curve to perform analyses and/or often require user knowledge of reference  
71 genomes and file formats. This limits the types of datasets that can be analysed without deploying a  
72 custom Galaxy instance, which in turn requires specialized skills. Likewise, for tasks beyond the  
73 basic transcriptome discovery analysis the user would need to know how to install and utilize  
74 additional tools in the Galaxy instance, somewhat hampering its usability to the potential user with  
75 only the basic computing skills. We would like to note that Galaxy Training Network  
76 (<https://training.galaxyproject.org/>) already provides a variety of excellent tutorials to help  
77 inexperienced Galaxy users to performed complex analyses (Batut et al. 2018). These tutorials

78 nonetheless require substantial time and effort investments from users, which may exclude small  
79 labs lacking necessary manpower or somewhat limit Galaxy's usability in the classrooms. In the  
80 past few years several toolboxes have been released in an effort to address such challenges with  
81 using Galaxy (e.g., Grüning et al. 2016; Hung et al. 2016; Meiss et al. 2017; Tithi et al. 2017;  
82 Beccuti et al. 2018; Hung et al. 2018). Yet, these toolkits are often designed to analyse only one  
83 specific dimension of transcriptome diversity, and/or not fully automated and require some prior  
84 knowledge of R command line script (Li et al., 2016).

85

## 86 **Implementation:**

### 87 *AIDD features overview*

88 To help overcome some of these limitations, our pipeline - Automated Isoform Diversity  
89 Detector (AIDD) - has been designed implicitly with a novice user in mind, and thus, can be used,  
90 for example, as an educational tool for RNA-seq-based laboratory exercises in the classroom setting  
91 with a minimal prior user training. Because the pipeline is packaged in a VirtualBox environment,  
92 it is easy to install on essentially any operating system and/or a broad range of hardware (Windows,  
93 Linux, MacOS) that is capable of handling a VirtualBox installation without concerns for  
94 compatibility. Yet despite the seeming simplicity of installing it, our AIDD pipeline is powerful  
95 enough to handle a broad range of RNA-seq analyses, spanning from differential gene and isoform  
96 expression, to variant calling, and RNA editing analysis using dimension reduction and machine  
97 learning approaches, including Guttman scale patterns (Proctor 1970) for time series analysis of  
98 ADAR editing landscapes. Unlike comparable tools, AIDD offers a fully automated data analysis  
99 pipeline with a simple setup and one-click execution, while still allowing for easily customizable  
100 options to account for a wide range of experimental conditions that users may wish to include.  
101 AIDD incorporates GATK haplotype caller (DePristo et al. 2011), which is currently not available  
102 from Galaxy, as a variant caller for RNA editing prediction, customizable R and bash scripts for  
103 detailed statistical analyses of the transcriptome, including RNA editing patterns as well as  
104 transcriptome-level differential expression combined with gene enrichment and pathway analysis.  
105 SnpEff (Cingolani et al. 2012) is used to add depth to the complete transcriptome analysis by  
106 predicting the impact of RNA editing on protein structure and function. AIDD also performs data  
107 visualization as part of the automated pipeline and produces publication-ready heatmaps, volcano  
108 and violin plots, bar charts and Venn diagrams.

109

110 *AIDD availability and hardware requirements*

111       The AIDD pipeline is built in an Oracle VirtualBox  
112 (<https://www.oracle.com/virtualization/virtualbox/index.html>) virtual machine based on Ubuntu  
113 18.04.2 LTS (Bionic Beaver) 64-bit PC (AMD64) desktop image  
114 (<http://releases.ubuntu.com/18.04/>) and contains all tools necessary for transcriptome-level analysis  
115 (Figure 1). The distributed VirtualBox image is ~ 20Gb in size and is publicly available for  
116 download via GoogleDrive link ([https://drive.google.com/open?id=1XOWh9H-](https://drive.google.com/open?id=1XOWh9H-v1nA6_VI53PI6G2gKaVoZX6ls)  
117 [v1nA6\\_VI53PI6G2gKaVoZX6ls](https://drive.google.com/open?id=1XOWh9H-v1nA6_VI53PI6G2gKaVoZX6ls) ). The up-to-date detailed description of included software tools,  
118 AIDD manual and step-by-step tutorial for AIDD are distributed via our GitHub site  
119 (<https://github.com/RNAdetective/AIDD>).

120       Implicitly tailored toward a novice user with no or minimal experience in computational  
121 analyses, AIDD is designed to run automatically with limited user input through a customizable  
122 bash script that controls multiple computational tools, including HISAT2 and GATK, among others,  
123 to comprehensively analyse RNA-seq datasets. AIDD can be deployed on almost any modern  
124 laboratory, classroom or office computer capable of running Ubuntu 18.04 in a VirtualBox  
125 environment. To shortcut the early learning curve, the pipeline is set up to run with default  
126 parameters directly “out of the box”, and includes commented out examples in the form of R  
127 markdown file that the user can choose to deploy as a step-by-step tutorial.

128       The minimum recommended hardware specifications include 4 GHz dual-core processor (or  
129 better), 8 to 12 GB system memory available to the virtual environment, and 50 GB of free hard  
130 drive space (<https://www.ubuntu.com/download/desktop>), although at least 16 GB system memory  
131 is recommended, and some applications may require more. For example, STAR alignment tool  
132 needs at least 10 times more memory bytes than the target genome, which for human genome  
133 translates into at least 32 GB and upwards if annotations are needed (Dobin and Gingeras 2015).

134

135 *Included example datasets: transcriptomes of ZIKV-infected neural progenitor cell lines and*  
136 *importance of ADAR gene family*

137       To illustrate the AIDD capabilities, we use a publicly available dataset from a study by  
138 McGrath et al. (2017) that contains RNA-seq data from three genetically distinct neural progenitor  
139 cell (NPC) lines infected with Zika virus (ZIKV) (McGrath et al. 2017). The authors found varying  
140 degrees of severity of symptoms associated with congenital Zika syndrome (CZS), including  
141 decreased differentiation and proliferation, and increased signs of apoptosis (McGrath et al. 2017).

142 McGrath et al. also reported increased expression of genes involved in innate immune response,  
143 including interferon alpha (IFNA) and adenosine deaminase acting on RNA (ADAR) during ZIKV  
144 infection (Supplementary Table 1 in McGrath et al. 2017). The ADAR gene family consists of three  
145 genes, namely, ADAR (also referred to as ADAR1), ADARB1 (ADAR2), and ADARB2 (ADAR3).  
146 Only ADAR and ADARB1 have proven deaminase activity (Chen et al. 2000; Jin, Zhang and Li  
147 2009; Walkley, Liddicoat and Hartner 2011) catalyzing the deamination of adenosine (A) to inosine  
148 (I) transition seen in RNA editing (Nishikura 2010; Savva, Rieder and Reenan 2012). ADARB2 is  
149 thought to play a regulatory role through competition with other ADARs for substrate binding  
150 (Hardt et al. 2008; Savva, Rieder and Reenan 2012). ADARs play a prominent role in the nervous  
151 system (Maas, Rich and Nishikura 2003; Tan et al. 2009; Savva, Rieder and Reenan 2012),  
152 specifically in the brain (Mehler and Mattick 2007; Liscovitch et al. 2014), where the majority of  
153 ADAR editing target genes are expressed (Melcher et al. 1996; Chen et al. 2000; Gonzalez et al.  
154 2011; Li and Church 2013), including during development (Wahlstedt et al. 2009).

155

#### 156 *Running AIDD: Uploading RNA-seq data into AIDD*

157 AIDD is designed to automatically download and convert RNA-seq datasets from the SRA  
158 accession numbers that user defines in the experimental conditions table. For the example analysis  
159 discussed here, a subset of Bioproject PRJNA360845 (McGrath et al. 2017) was downloaded and  
160 converted to fastq format. Once converted to fastq format, fastqc  
161 (<http://www.bioinformatics.babraham.ac.uk/projects/fastqc/>) is used for quality control. Upon user  
162 assessment of quality of files, fastx-Toolkit ([http://hannonlab.cshl.edu/fastx\\_toolkit/](http://hannonlab.cshl.edu/fastx_toolkit/)) is used to trim  
163 fastq files to assure best quality for alignment. In addition to downloading and preparing sequences,  
164 AIDD also automatically downloads and formats all necessary default references and indexes for  
165 human genome to run the tools. There are also options for user-defined reference sets, e.g., if RNA-  
166 seq data comes from mouse rather than human. AIDD can also run from locally stored fastq or  
167 standard alignment SAM/BAM files.

168 In addition to PRJNA360845 RNA-seq data (McGrath et al. 2017), the included tutorial  
169 uses a second dataset from Bioproject PRJNA313294 (Tang et al. 2016). While PRJNA313294-  
170 based results are not discussed here, they are available through the AIDD manual and in the  
171 distributed AIDD image (<https://github.com/RNAdetective/AIDD>).

172

173

174 *Running AIDD: Reads alignment and assembly*

175       Once the RNA-seq data and the reference files have been downloaded, the reads are aligned  
176 to the chosen reference (GRCh37\_snp\_tran is used as a default, and in this example). The pipeline  
177 uses HISAT2 (Kim, Langmead and Salzberg 2015) as a default alignment tool. SALMON (Patro et  
178 al. 2017) and STAR (Dobin et al. 2013) aligners are also available as options. The HISAT2  
179 (<https://ccb.jhu.edu/software/hisat2/index.shtml>) aligner is a low-memory yet sensitive alignment  
180 program that allows for comparable results to other slow and more memory intensive aligners such  
181 as STAR (Dobin and Gingeras 2015; Kim, Langmead and Salzberg 2015). Once the reads have  
182 been aligned, the output files (SAM format) are converted into BAM format using Picard tools  
183 (<http://broadinstitute.github.io/picard/>) in preparation for variant calling and transcriptome analysis.  
184 The pipeline saves these intermediate files should the user ever need to use them for additional  
185 analyses.

186       Next, the transcriptome is reconstructed using Stringtie (Pertea et al. 2015), with cufflinks  
187 available as an option  
188 (<https://software.broadinstitute.org/cancer/software/genepattern/modules/docs/Cuffdiff/7>), with  
189 output generated as raw counts (Fragments Per Kilobase Million (FKPM), Transcripts Per Kilobase  
190 Million (TPM), and coverage) in the “counts” folder, and gene transfer format (GTF) files. The  
191 latter are then automatically modified into the count matrix for subsequent input into DESeq2  
192 (Love, Huber and Anders 2014; Varet et al. 2016), using the coverage correction for raw counts  
193 unique to Stringtie. The conversion step is performed by a Python script available from the  
194 Stringtie website (<https://ccb.jhu.edu/software/stringtie/>).

195

196 *Running AIDD: Differential Expression Analysis*

197       Once reads have been mapped, DESeq2 (Love et al., 2014) and other dependent packages  
198 are used to generate gene-level and transcript-level differential expression outputs, including results  
199 of the principal component analysis. The latter can be used as a quality control or as an exploratory  
200 analysis step, to verify the similarity among samples or treatments, and to identify outliers. DESeq2  
201 uses empirical Bayes shrinkage approach to take into account within-group variation as well as fold  
202 change estimation to control for variance observed in the low read count genes (Love et al., 2014).  
203 This approach allows for increased sensitivity and decreased false positive rate (Love et al., 2014).  
204 A user supplied gene list, for example, a Gene Ontology (GO)-based list, can be used to create  
205 pathway expression heatmaps and volcano plots to visualize significantly differentially expressed

206 genes involved in those user-defined pathways, along with the default pathways for GO terms  
207 involved in neural development, proliferation, differentiation and signalling as well as the gene list  
208 of the innate interferon pathway that we used to explore the role of ADAR editing in CZS  
209 (Supplementary Tables 1-5). Additional pathway enrichment analysis is automatically performed  
210 using included R package topGO (Alexa and Rahnenfuhrer 2010). Alternatively, generated gene  
211 and transcript lists can be used with outside gene enrichment analysis tools such as PANTHER (Mi  
212 et al. 2010) or DAVID (Huang da et al. 2007).

213

#### 214 *Running AIDD: Variant Calling*

215 While the state of the art identification of genomic variants that can be linked to phenotypic  
216 variation is based upon whole-genome (WGS) or whole-exome sequencing (WES) (Piskol,  
217 Ramaswami and Li 2013), much broader availability (and affordability) of transcriptome  
218 sequencing data makes it another appealing source of variants discovery (Han et al. 2015).  
219 Furthermore, some mechanisms of variants generation – such as RNA editing and splice-site  
220 variation – can only be studied at the transcriptome level. Thus, our pipeline includes tools enabling  
221 variant discovery from transcriptome data, with the focus on ADAR-mediated RNA editing.

222 GATK haplotype caller (McKenna et al. 2010) is the tool used in AIDD to infer potential  
223 RNA editing events, based upon the best practice settings as defined by the GATK developers as of  
224 March 2019 (<https://software.broadinstitute.org/gatk/documentation/article.php?id=3891>). Picard  
225 tools are used for quality control and proper formatting of input files. Haplotype caller is used  
226 twice in the pipeline, along with filtering steps to control for both false positives and false  
227 negatives. SnpEff is then used to predict consequences on protein structure and function for the  
228 inferred variants (Cingolani et al. 2012). Once a final list of potential variants is generated, these  
229 are then processed using R scripts to demonstrate both global and local view of RNA editing.  
230 Additional set of R scripts will then compare differential ADAR editing landscapes between  
231 conditions. It should be noted that here we focus on potential editing events within coding regions,  
232 and thus, we are not considering hyperediting events (Porath, Carmi and Levanon 2014). Likewise,  
233 genomic polymorphisms can appear as potential editing events in RNA-seq, and thus we include an  
234 annotation of detected edited site candidates with available polymorphism data (where applicable).  
235 Figure 2 and Supplementary Table 6 outline various tools, used, as well as folders and files  
236 generated by the pipeline.

237



238 **Results and discussion:**

239 To illustrate AIDD's capabilities, we describe results from the included tutorial that uses  
240 Bioproject PRJNA313294 data from (McGrath et al. 2017). Using PRJNA313294 data, AIDD  
241 mapped reads and then computed normalized and transformed gene and transcript count matrices  
242 for differential expression (DE) analysis using DESeq2 with a multivariate model for infection  
243 status taking into account cell-line identity. Principle component analysis (PCA) of the top 500  
244 expressed genes showed that ~47% of the variance is explained by the first principle component,  
245 which separated cell lines by fetal age, with K048 cell line derived from the 9 week old fetal tissue  
246 being separated from the 13 weeks old fetal tissue of G010 and K054 cell lines. The second  
247 principle component explained ~27% of the variation, and clustered ZIKV-infected cells from the  
248 mock infected cells, except in the case of the G010 cell line (Figure 3A). The pipeline also  
249 generated a heatmap of the top 60 differentially expressed genes with hierarchal clustering that  
250 showed clustering of samples by infection status, except for the G010 cell line (Figure 3B). This  
251 latter phenomenon is consistent with reported findings of McGrath et al. (McGrath et al. 2017) that  
252 showed that G010 cells exhibited the least amount of cytopathic effects, if any, due to ZIKV  
253 infection, potentially reflecting genetic heterogeneity across studied cells. Figure 3C shows  
254 generated volcano plots that visualize the top 20 differentially expressed genes between ZIKV and  
255 mock infections taking into account differences in cell-lines. AIDD generates clustering heatmaps  
256 for each cell line, which showed that while both K048 and K054 exhibit clear differences between  
257 mock and ZIKV infections consistent with the phenotypic differences between the two conditions  
258 (Figure 3D & E), G010 cells showed no significant difference between ZIKV and mock infected  
259 cells, consistent with McGrath et al. (2017) results (Figure 3F). By looking at each cell line  
260 individually, AIDD is able to highlight differential effects of ZIKV infection in combination with  
261 host genetics that are consistent with results originally reported by McGrath et al. (2017) (Figure  
262 3G, H & I).

263

264 *Pathways analysis:*

265 The gene pathways exploration tool included in AIDD was used to examine differential  
266 expression in neurodevelopmental pathways during ZIKV infection. Using gene list supplied by the  
267 user, AIDD will generate customized heatmap, volcano plot, and data table with differential  
268 expression results for genes of interest. Gene ontology (GO) terms "innate immunity", "brain  
269 development", "central nervous system development", "neurological development", and "peripheral

270 nervous system” are already included as default pathways. We also included a custom gene list for  
271 genes in the interferon alpha pathway (Supplementary Table 1). AIDD results showed that ZIKV-  
272 infected cells showed increased expression of innate immune genes (Figure 4A), as well as those in  
273 the interferon alpha pathway, including ADAR (Figure 4B), except for the G010 cells. Consistent  
274 with McGrath et al. findings (McGrath et al. 2017), cell lines that have CZS-like phenotypic  
275 appearance if ZIKV infected (namely, K048 and K054) have significant differential expression in  
276 the majority of the genes involved in the interferon alpha pathway (Figure 4C & D), whereas G010  
277 cells that appear to be essentially normal phenotypically showed only a few significantly  
278 differentially expressed genes in the interferon alpha pathway (Figure 4E), pointing to potential  
279 involvement of interferon alpha response in ZIKV infection and CZS-like symptoms (Piontkivska et  
280 al. 2019). On the other hand, only cell line-associated differences but not the ZIKV infection-  
281 mediated differences were observed for genes associated with GO terms of brain development  
282 (Figure 4F), central nervous system development (Figure 4G), neurological development (Figure  
283 4H), and peripheral nervous system development (Figure 4I).

284

#### 285 *Mapping ADAR expression and editing landscapes*

286 To explore the potential role of ADAR enzymes and ADAR editing, AIDD allows us to  
287 focus on expression of ADAR genes and editing patterns (Supplementary Tables 7 & 8), including  
288 applying Guttman scale patterns to identify temporal changes in ADAR editing landscapes  
289 (Supplementary Figure 1). The results showed that ADAR1p150 isoform-specific expression was  
290 significantly higher in ZIKV infected cells with the CZS phenotype (K048 and K054), while not  
291 being significantly different in G010 cells (Figure 5A). Interestingly, ADARB1 showed the  
292 opposite pattern, being significantly upregulated in G010 cells, but not in cells with CZS-like  
293 phenotype (Figure 5B). Because ADARB1 and ADAR both share some overlapping editing targets  
294 as well as have gene-specific ones (Lehmann and Bass 2000; Riedmann et al. 2008), this expression  
295 pattern suggests that both ADAR genes may play complementary roles in the differential response  
296 to ZIKV infection (Piontkivska et al. 2019). This would be consistent with prior suggestions that  
297 ADARB1 contributes to dysregulation of RNA editing in many diseases (Amore et al. 2004; Cenci  
298 et al. 2008; Hideyama et al. 2012; Karanovic et al. 2015).

299 AIDD also allows the user to map ADAR editing landscapes by performing variant calling  
300 to identify potential A to G substitutions. Globally, we found that the total numbers of A to G  
301 substitutions are higher in ZIKV-infected in both the G010 and K048 cell lines but not in the K054

302 line (Figure 5C). However, when the potential impact of these substitutions on protein structure and  
303 function is examined, cell lines with the CZS-like phenotype (K048 and K054) had more of high  
304 and moderate impact variants detected in ZIKV infection, while seemingly normal G010 cells had  
305 smaller number of potentially impactful changes in ZIKV infection (Figure 5D, E & F).

306 It should be noted that one major challenge of using variant calling methods for detecting  
307 RNA editing events is the need to have a sufficient coverage depth (of at least 50 million reads or  
308 higher per sample) to accurately detect editing events when editing frequencies are low. AIDD  
309 attempts to correct for this by normalizing substitution counts by the read depth as determined from  
310 alignment algorithms. Therefore, these observed editing differences among cell lines could be  
311 attributed to interactions between ADAR family members as well as ADAR preferences at the  
312 editing sites, and spatio-temporal regulation of editing.

313 We were also interested in editing events at known editing sites in ion channels and  
314 transporters that are known to be associated with fine-tuning of neural signalling, including  
315 excitotoxicity, brain development and neural plasticity (Tan et al. 2009; Hood and Emeson 2012;  
316 Eran et al. 2013). To define the excitome, computationally-predicted ADAR editing sites found in  
317 psychiatric disorders confirmed with PCR (Zhu et al., 2012) were combined with editing sites from  
318 RADAR database that were previously examined in Alzheimer's disease (Khmermesh et al., 2016) to  
319 create a list of 151 editing sites located in 91 genes (Supplementary Table 8). In part because of  
320 relatively low coverage in all three cell lines as well as rather drastic differences in fetal age, the  
321 editing patterns at specific sites varied both between different cell lines and between infected and  
322 uninfected cells. ZIKV infected K048 cells showed likely editing events at multiple sites, including  
323 at two ion channel receptors (namely, GRIA3 and GRIN3B). Other ZIKV-induced editing events  
324 were detected at IGFBP7, KIF20B and SRP9 genes, responsible for controlling cellular metabolism,  
325 vesicular transport, and proper protein storage and transport respectively (Godfried Sie et al. 2012;  
326 Ivanova et al. 2015; Lee et al. 2017; McNeely, Little and Dwyer 2019). There was also an increased  
327 editing detected at the ATXN7 gene that is implicated in degenerative ataxia (Clark et al. 2015).  
328 ZIKV infected K054 cells showed likely editing events in PTPRN2, GRIA2 Q/R site, GRIA3 and  
329 IGFBP7, whereas uninfected cells showed editing events in ATXN7, BEST1, BLCAP, and  
330 KIF20B. ZIKV infected G010 cells exhibited increased editing in ATXN7, KIF20B, and PTPRN2,  
331 and decreased editing at the NEIL1 genes. Changes in editing landscapes can also be visualized  
332 with Guttman scale patterns, where differences between distinct cell lines as well as mock and  
333 infected cells are shown for individual editing events/residues (Supplementary Figure 1). However,

334 further transcriptomics studies – including at much higher read depth - are needed to fully elucidate  
335 the changes in editing patterns that can be induced by viral infections.

336

### 337 **Conclusions:**

338 A fully automated pipeline, Automated Isoform Diversity Detector (AIDD), has been  
339 developed to facilitate RNA-seq analyses focused on changes in transcriptome diversity, including  
340 isoform expression ratios and ADAR-editing events. A publicly available dataset of human neural  
341 progenitor cells (McGrath et al. 2017) is used to demonstrate how AIDD pipeline can be used to  
342 robustly and reproducibly analyse transcriptome diversity and to infer RNA editing patterns from  
343 RNA-seq data. Presented results illustrate the importance of examining both the gene-level and the  
344 isoform-level expression differences, as well as exploring RNA editing aspects of transcriptome  
345 diversity and their potential association with pathogenicity mechanisms.

346 AIDD pipeline has additional benefits of being novice-user friendly and completely  
347 automated for highly reproducible results. Briefly, AIDD incorporates multiple steps needed for  
348 using RNA-seq data to study transcriptome diversity, and offers an easy-to-use pipeline for  
349 mapping and contrasting genome-wide RNA editing patterns, with focus on protein-coding  
350 transcripts (Supplementary Table 8). Once reads have been mapped to the reference genome, AIDD  
351 uses DESeq2 to infer patterns of differential expression at both gene and transcript levels. For users  
352 - such as ourselves - interested in patterns of editing of excitome-related genes, AIDD will  
353 summarize the expression of the excitome gene members, including ADARs and other genes with  
354 known editing sites. AIDD will further summarize global RNA editing patterns and infer  
355 correlations between edited sites and ADAR expression patterns. Lastly, lists of genes involved in  
356 ADAR editing landscape changes are produced and can be used as potential biomarkers for  
357 diagnostic and prognostic purposes.

358 The distributed pipeline image includes a user-friendly tutorial written in R markdown that  
359 can be used to illustrate AIDD features in a classroom setting as teaching tool and/or to generate  
360 hypotheses for future experimental validation, or both. The ZIKV infection-associated example  
361 described in this paper further highlights the ability of AIDD to conduct complicated analyses  
362 within the constraints of a small research laboratory. Future work includes testing AIDD's accuracy  
363 against simulated reads with known editing sites and across various read depths per sample, as well  
364 as expanding AIDD's ability for variant calling by incorporating other methods (such as Freebayes,  
365 Garrison and Marth 2012). AIDD can also be used in meta-analysis of publically available RNA-

366 seq datasets to comprehensively map ADAR editing landscapes across different cells and  
367 organisms, and to facilitate discovery of novel diagnostic and prognostic biomarkers and potential  
368 targets for drug therapies.

369

## 370 **Declarations**

371 *Ethics approval and consent to participate*

372 Not applicable.

373 *Consent for publication*

374 Not applicable.

375 *Availability of data and materials*

376 The datasets used in this current study are publicly available in the NCBI SRA/BioProject  
377 repository, at <https://www.ncbi.nlm.nih.gov/bioproject/PRJNA360845/> and

378 <https://www.ncbi.nlm.nih.gov/bioproject/?term=PRJNA313294>.

379 The AIDD pipeline is distributed via GitHub, at <https://github.com/RNAdetective/AIDD>.

380 *Competing interests*

381 The authors declare that they have no competing interests.

382 *Funding*

383 This work was partially supported by a Kent State University Research Council Seed  
384 Award, Brain Health Research Institute Pilot Award, and the National Institutes of Health (NIA  
385 award R21AG064479-01). The funders had no role in the design of the study and collection,  
386 analysis, and interpretation of data and in writing the manuscript.

387 *Authors' contributions*

388 NMP designed and implemented the pipeline, and wrote the manuscript. EJ, MF, HM and  
389 GF contributed to conceptualization of pipeline features, testing of code components and validation,  
390 and provided manuscript feedback. RM and GC contributed to conceptualization of pipeline  
391 features and analysis steps. HP conceived the pipeline, supervised the project, helped with code and  
392 testing, and wrote the manuscript. All authors read and approved the final manuscript.

393 *Acknowledgements*

394 Not applicable.

395

396

397 **References**

- 398 Afgan, E., et al. (2016). "The Galaxy platform for accessible, reproducible and collaborative  
399 biomedical analyses: 2016 update." Nucleic Acids Res 44(W1): W3-W10.
- 400 Albert, F. W. and L. Kruglyak (2015). "The role of regulatory variation in complex traits and  
401 disease." Nat Rev Genet 16(4): 197-212.
- 402 Alexa, A. and J. Rahnenfuhrer (2010). "topGO: enrichment analysis for gene ontology." R package  
403 version 2(0).
- 404 Amore, M., et al. (2004). "Sequence analysis of ADARB1 gene in patients with familial bipolar  
405 disorder." J Affect Disord 81(1): 79-85.
- 406 Ardlie, K. G. and R. Guigo (2017). "Data Resources for Human Functional Genomics." Curr Opin  
407 Syst Biol 1: 75-79.
- 408 Batut, B., et al. (2018). "Community-Driven Data Analysis Training for Biology." Cell Syst 6(6):  
409 752-758 e751.
- 410 Beccuti, M., et al. (2018). "SeqBox: RNAseq/ChIPseq reproducible analysis on a consumer game  
411 computer." Bioinformatics 34(5): 871-872.
- 412 Cenci, C., et al. (2008). "Down-regulation of RNA editing in pediatric astrocytomas: ADAR2  
413 editing activity inhibits cell migration and proliferation." J Biol Chem 283(11): 7251-7260.
- 414 Chen, C. X., et al. (2000). "A third member of the RNA-specific adenosine deaminase gene family,  
415 ADAR3, contains both single- and double-stranded RNA binding domains." Rna 6(5): 755-  
416 767.
- 417 Cingolani, P., et al. (2012). "A program for annotating and predicting the effects of single  
418 nucleotide polymorphisms, SnpEff: SNPs in the genome of *Drosophila melanogaster* strain  
419 w1118; iso-2; iso-3." Fly (Austin) 6(2): 80-92.
- 420 Clark, L. N., et al. (2015). "Genetic analysis of ten common degenerative hereditary ataxia loci in  
421 patients with essential tremor." Parkinsonism Relat Disord 21(8): 943-947.
- 422 Conesa, A., et al. (2016). "A survey of best practices for RNA-seq data analysis." Genome Biol 17:  
423 13.
- 424 DePristo, M. A., et al. (2011). "A framework for variation discovery and genotyping using next-  
425 generation DNA sequencing data." Nat Genet 43(5): 491-498.
- 426 Dobin, A., et al. (2013). "STAR: ultrafast universal RNA-seq aligner." Bioinformatics 29(1): 15-21.
- 427 Dobin, A. and T. R. Gingeras (2015). "Mapping RNA-seq Reads with STAR." Curr Protoc  
428 Bioinformatics 51: 11 14 11-19.

- 429 ENCODE\_Project\_Consortium (2004). "The ENCODE (ENCyclopedia Of DNA Elements)  
430 Project." Science 306(5696): 636-640.
- 431 Eran, A., et al. (2013). "Comparative RNA editing in autistic and neurotypical cerebella." Mol  
432 Psychiatry 18(9): 1041-1048.
- 433 Gallo, A., et al. (2017). "ADAR RNA editing in human disease; more to it than meets the I." Hum  
434 Genet 136(9): 1265-1278.
- 435 Garrison, E. and G. Marth (2012). "Haplotype-based variant detection from short-read sequencing."  
436 arXiv preprint arXiv:1207.3907.
- 437 Godfried Sie, C., et al. (2012). "IGFBP7's susceptibility to proteolysis is altered by A-to-I RNA  
438 editing of its transcript." FEBS Lett 586(16): 2313-2317.
- 439 Goecks, J., A. Nekrutenko and J. Taylor (2010). "Galaxy: a comprehensive approach for supporting  
440 accessible, reproducible, and transparent computational research in the life sciences."  
441 Genome Biol 11(8): R86.
- 442 Gonzalez, C., et al. (2011). "Editing of human K(V)1.1 channel mRNAs disrupts binding of the N-  
443 terminus tip at the intracellular cavity." Nat Commun 2: 436.
- 444 Grüning, B., et al. (2016). "Enhancing pre-defined workflows with ad hoc analytics using Galaxy,  
445 Docker and Jupyter." bioRxiv: 075457.
- 446 Han, Y., et al. (2015). "Advanced Applications of RNA Sequencing and Challenges." Bioinform  
447 Biol Insights 9(Suppl 1): 29-46.
- 448 Hardt, O., et al. (2008). "Gene expression analysis defines differences between region-specific  
449 GABAergic neurons." Mol Cell Neurosci 39(3): 418-428.
- 450 Hasin, Y., M. Seldin and A. Lusic (2017). "Multi-omics approaches to disease." Genome Biol  
451 18(1): 83.
- 452 Hideyama, T., et al. (2012). "Profound downregulation of the RNA editing enzyme ADAR2 in ALS  
453 spinal motor neurons." Neurobiol Dis 45(3): 1121-1128.
- 454 Hood, J. L. and R. B. Emeson (2012). "Editing of neurotransmitter receptor and ion channel RNAs  
455 in the nervous system." Curr Top Microbiol Immunol 353: 61-90.
- 456 Huang da, W., et al. (2007). "DAVID Bioinformatics Resources: expanded annotation database and  
457 novel algorithms to better extract biology from large gene lists." Nucleic Acids Res 35(Web  
458 Server issue): W169-175.
- 459 Hung, L.-H., et al. (2018). "Building containerized workflows using the BioDepot-workflow-  
460 builder (Bwb)." bioRxiv: 099010.

- 461 Hung, L. H., et al. (2016). "GUIDock: Using Docker Containers with a Common Graphics User  
462 Interface to Address the Reproducibility of Research." PLoS One 11(4): e0152686.
- 463 Ivanova, E., et al. (2015). "Alu RNA regulates the cellular pool of active ribosomes by targeted  
464 delivery of SRP9/14 to 40S subunits." Nucleic Acids Res 43(5): 2874-2887.
- 465 Jin, Y., W. Zhang and Q. Li (2009). "Origins and evolution of ADAR-mediated RNA editing."  
466 IUBMB Life 61(6): 572-578.
- 467 Karanovic, J., et al. (2015). "Joint effect of ADARB1 gene, HTR2C gene and stressful life events  
468 on suicide attempt risk in patients with major psychiatric disorders." World J Biol  
469 Psychiatry 16(4): 261-271.
- 470 Khremesh, K., et al. (2016). "Reduced levels of protein recoding by A-to-I RNA editing in  
471 Alzheimer's disease." RNA 22(2): 290-302.
- 472 Kim, D., B. Langmead and S. L. Salzberg (2015). "HISAT: a fast spliced aligner with low memory  
473 requirements." Nat Methods 12(4): 357-360.
- 474 Kwon, T., et al. (2015). "Next-generation sequencing data analysis on cloud computing." Genes &  
475 Genomics 37(6): 489-501.
- 476 Lee, S. H., et al. (2017). "Identification of Diverse Adenosine-to-Inosine RNA Editing Subtypes in  
477 Colorectal Cancer." Cancer Res Treat 49(4): 1077-1087.
- 478 Lehmann, K. A. and B. L. Bass (2000). "Double-stranded RNA adenosine deaminases ADAR1 and  
479 ADAR2 have overlapping specificities." Biochemistry 39(42): 12875-12884.
- 480 Li, J. B. and G. M. Church (2013). "Deciphering the functions and regulation of brain-enriched A-  
481 to-I RNA editing." Nat Neurosci 16(11): 1518-1522.
- 482 Liscovitch, N., et al. (2014). "Positive correlation between ADAR expression and its targets  
483 suggests a complex regulation mediated by RNA editing in the human brain." RNA Biol  
484 11(11): 1447-1456.
- 485 Love, M. I., W. Huber and S. Anders (2014). "Moderated estimation of fold change and dispersion  
486 for RNA-seq data with DESeq2." Genome Biol 15(12): 550.
- 487 Maas, S., A. Rich and K. Nishikura (2003). "A-to-I RNA editing: recent news and residual  
488 mysteries." J Biol Chem 278(3): 1391-1394.
- 489 McGrath, E. L., et al. (2017). "Differential Responses of Human Fetal Brain Neural Stem Cells to  
490 Zika Virus Infection." Stem Cell Reports 8(3): 715-727.
- 491 McNeely, K. C., J. N. Little and N. D. Dwyer (2019). "Cytokinetic abscission dynamics in  
492 neuroepithelial stem cells during brain development." bioRxiv: 529164.



493 McKenna, A., et al. (2010). "The Genome Analysis Toolkit: a MapReduce framework for analyzing  
494 next-generation DNA sequencing data." Genome Res 20(9): 1297-1303.

495 Mehler, M. F. and J. S. Mattick (2007). "Noncoding RNAs and RNA editing in brain development,  
496 functional diversification, and neurological disease." Physiol Rev 87(3): 799-823.

497 Meiss, T., et al. (2017). "Software solutions for reproducible RNA-seq workflows." bioRxiv:  
498 099028.

499 Melcher, T., et al. (1996). "RED2, a brain-specific member of the RNA-specific adenosine  
500 deaminase family." J Biol Chem 271(50): 31795-31798.

501 Mi, H., et al. (2010). "PANTHER version 7: improved phylogenetic trees, orthologs and  
502 collaboration with the Gene Ontology Consortium." Nucleic Acids Res 38(Database issue):  
503 D204-210.

504 Nishikura, K. (2010). "Functions and regulation of RNA editing by ADAR deaminases." Annu Rev  
505 Biochem 79: 321-349.

506 Ozsolak, F. and P. M. Milos (2011). "RNA sequencing: advances, challenges and opportunities."  
507 Nat Rev Genet 12(2): 87-98.

508 Patro, R., et al. (2017). "Salmon provides fast and bias-aware quantification of transcript  
509 expression." Nat Methods 14(4): 417-419.

510 Pertea, M., et al. (2015). "StringTie enables improved reconstruction of a transcriptome from RNA-  
511 seq reads." Nat Biotechnol 33(3): 290-295.

512 Piontkivska, H., et al. (2019). "Explaining Pathogenicity of Congenital Zika and Guillain-Barre  
513 Syndromes: Does Dysregulation of RNA Editing Play a Role?" Bioessays 41(6): e1800239.

514 Piskol, R., G. Ramaswami and J. B. Li (2013). "Reliable identification of genomic variants from  
515 RNA-seq data." Am J Hum Genet 93(4): 641-651.

516 Porath, H. T., S. Carmi and E. Y. Levanon (2014). "A genome-wide map of hyper-edited RNA  
517 reveals numerous new sites." Nat Commun 5: 4726.

518 Proctor, C. H. (1970). "A probabilistic formulation and statistical analysis of Guttman scaling."  
519 Psychometrika 35(1): 73-78.

520 Riedmann, E. M., et al. (2008). "Specificity of ADAR-mediated RNA editing in newly identified  
521 targets." RNA 14(6): 1110-1118.

522 Savva, Y. A., L. E. Rieder and R. A. Reenan (2012). "The ADAR protein family." Genome Biol  
523 13(12): 252.

524 Svensson, V., R. Vento-Tormo and S. A. Teichmann (2018). "Exponential scaling of single-cell  
525 RNA-seq in the past decade." Nat Protoc 13(4): 599-604.

526 Tan, B. Z., et al. (2009). "Dynamic regulation of RNA editing of ion channels and receptors in the  
527 mammalian nervous system." Mol Brain 2: 13.

528 Tang, H., et al. (2016). "Zika Virus Infects Human Cortical Neural Progenitors and Attenuates Their  
529 Growth." Cell Stem Cell 18(5): 587-590.

530 Tithi, S. S., et al. (2017). "Biopipe: A Lightweight System Enabling Comparison of Bioinformatics  
531 Tools and Workflows." bioRxiv: 201186.

532 Varet, H., et al. (2016). "SARTools: A DESeq2- and EdgeR-Based R Pipeline for Comprehensive  
533 Differential Analysis of RNA-Seq Data." PLoS One 11(6): e0157022.

534 Wahlstedt, H., et al. (2009). "Large-scale mRNA sequencing determines global regulation of RNA  
535 editing during brain development." Genome Res 19(6): 978-986.

536 Walkley, C. R., B. Liddicoat and J. C. Hartner (2011). Role of ADARs in mouse development.  
537 Adenosine Deaminases Acting on RNA (ADARs) and A-to-I Editing. C. E. Samuel,  
538 Springer: 197-220.

539 Wang, Z. and A. Ma'ayan (2016). "An open RNA-Seq data analysis pipeline tutorial with an  
540 example of reprocessing data from a recent Zika virus study." F1000Res 5: 1574.

541 Wysoker A, Tibbetts K, Fennell T (2019). Picard. [<http://broadinstitute.github.io/picard/>] 2019.

542 Zhu, H., et al. (2012). "Quantitative analysis of focused a-to-I RNA editing sites by ultra-high-  
543 throughput sequencing in psychiatric disorders." PLoS One 7(8): e43227.

544

545

546

547

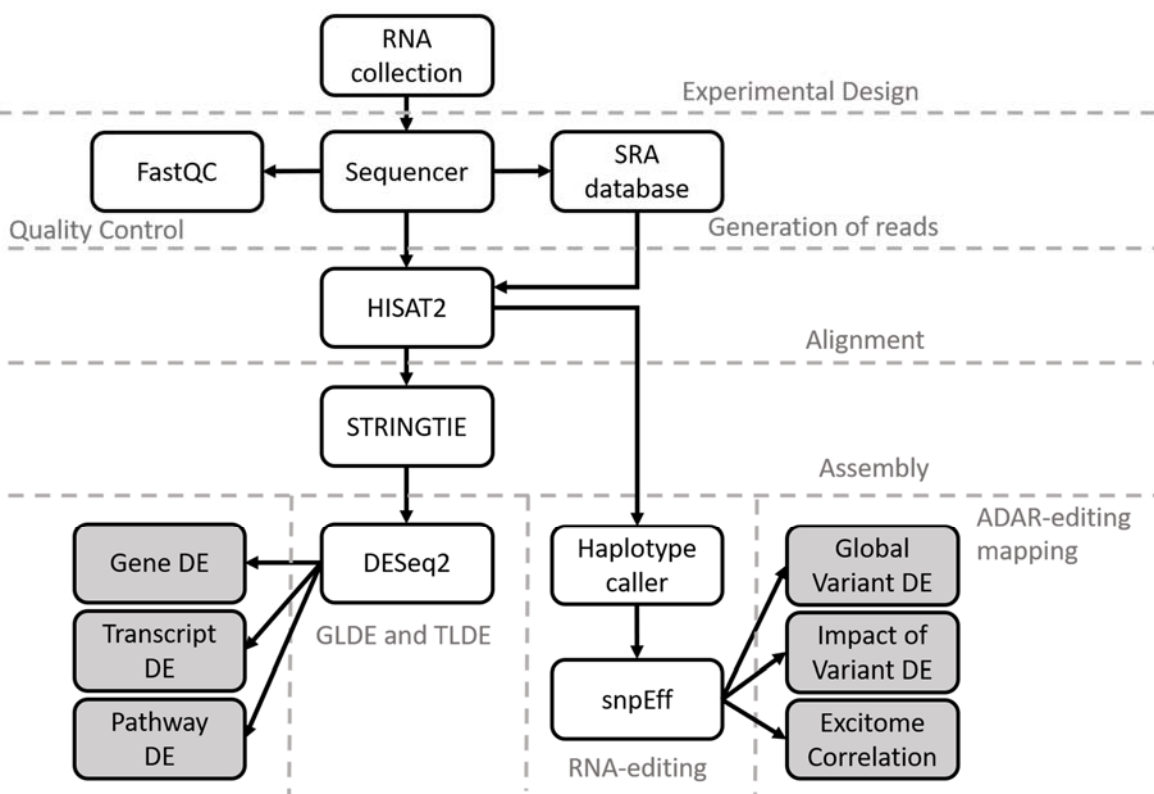

548

549

550 Figure 1: Flow chart of the tools and steps used in the automated workflow carried out by AIDD

551 pipeline. The analysis begins from gathering relevant RNA-seq data files from the NCBI SRA

552 database, followed by reads alignment using HISAT2 with Ensembl annotations. Transcriptome

553 assembly is then performed by Stringtie. Downstream expression analysis can be performed using

554 multiple tools, including DESeq2, edgeR and topGO. Variant calling to detect RNA-editing events,

555 including A-to-I editing, is performed using tools implemented in GATK; and statistical analysis of

556 the effect of RNA editing is performed using custom R scripts.

557

558

559

560  
561  
562

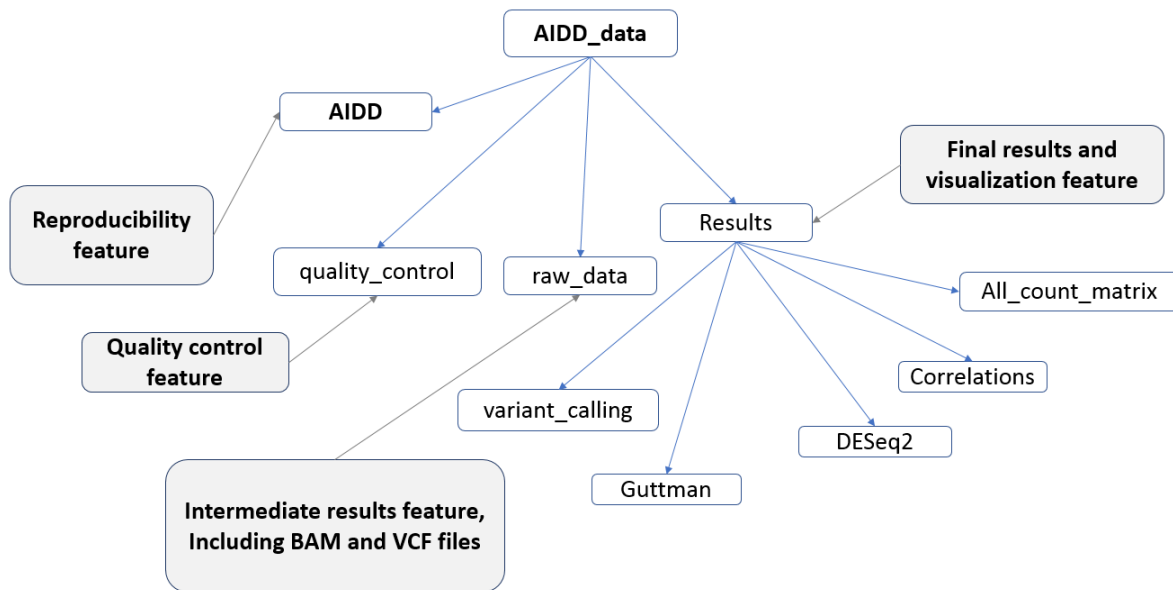

563  
564  
565  
566  
567  
568  
569  
570  
571

Figure 2: Flow chart showing directory structure created by AIDD. The main folder is AIDD\_data and contains 4 folders including (i) AIDD, containing all scripts used in analysis for reproducibility, (ii) quality control files, (iii) intermediate files, including BAM, GTF and VCF files, (iv) results of statistical analysis and data visualization including differential isoform expression and ADAR editing landscapes.

572

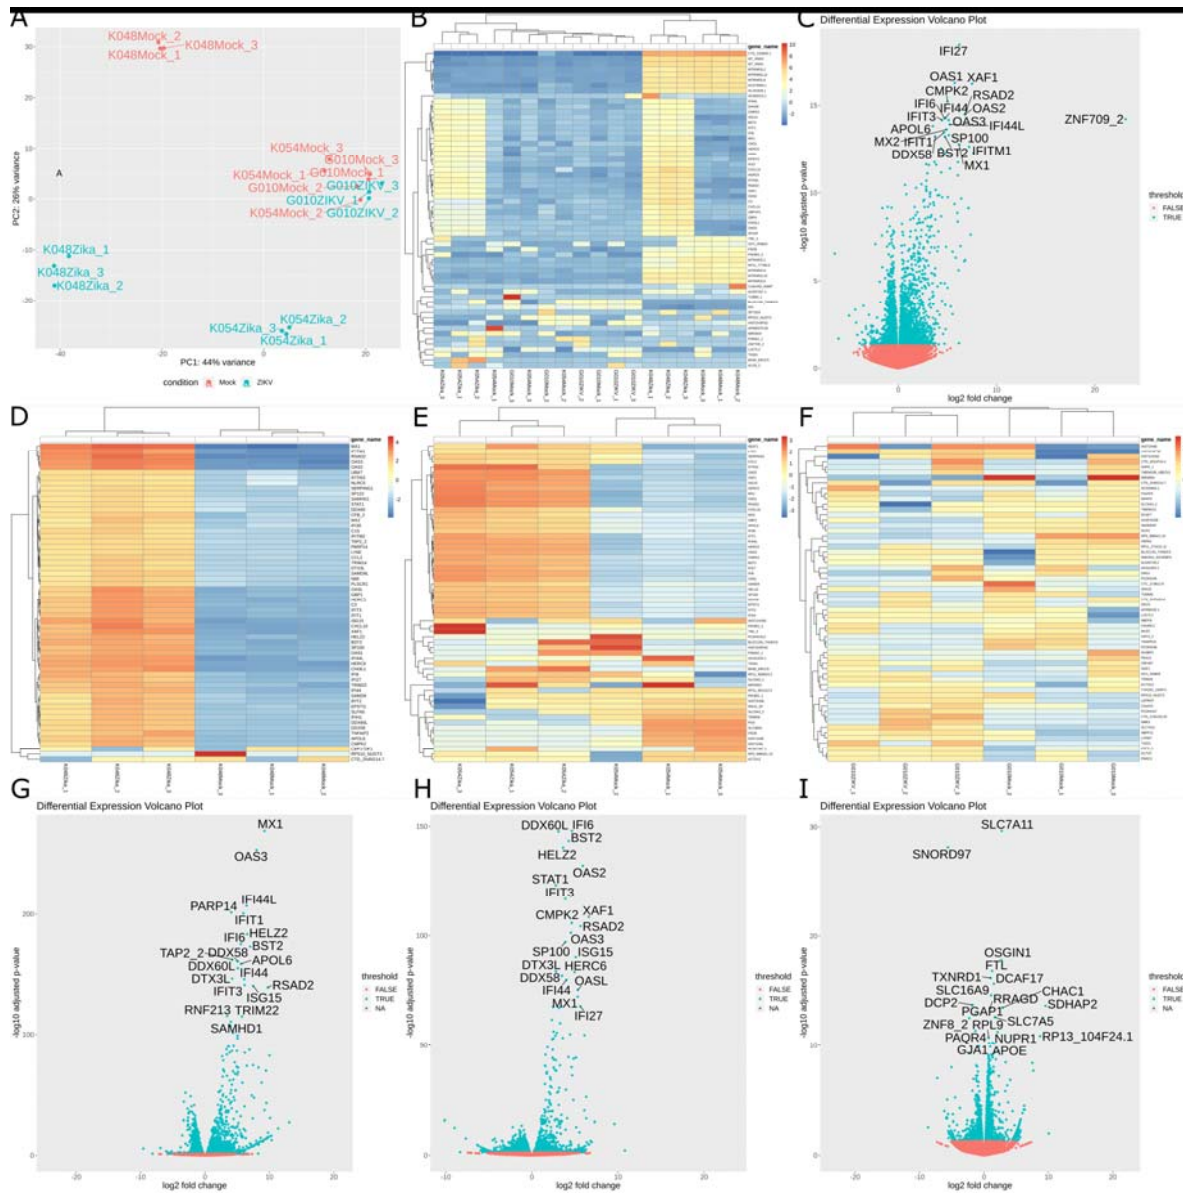

573

574

575 Figure 3: Visualization of differential expression analysis using AIDD. (A) Principle component  
 576 analysis of the top 500 expressed genes counts show 47% of the variance in the system is attributed  
 577 to differences in cell lines and 27% of the variance is attributed to ZIKV infection status. (B) The  
 578 top 500 hierarchal clustering also shows clustering of CSZ phenotype cell line (K048 & K054)  
 579 ZIKV infected cells and normal phenotype cells (G010) regardless of ZIKV infection status  
 580 clustered with the CSZ phenotype cell line mock infections. (C) The top 20 differentially expressed

581 genes during ZIKV infection taking into account genetic cell line differences highlight the innate  
582 immune activation. When looking at each cell line independently, K048 (D) and K054 cells (E)  
583 have clear pattern of differentially expressed genes during ZIKV infection, whereas G010 cells (F)  
584 shows less of a pattern of differentially expressed genes. Panels G-I show that when the top 20  
585 differentially expressed genes are considered, each genetically distinct cell line shows a  
586 differentially gene expression response to ZIKV infection.

587

588

589

590

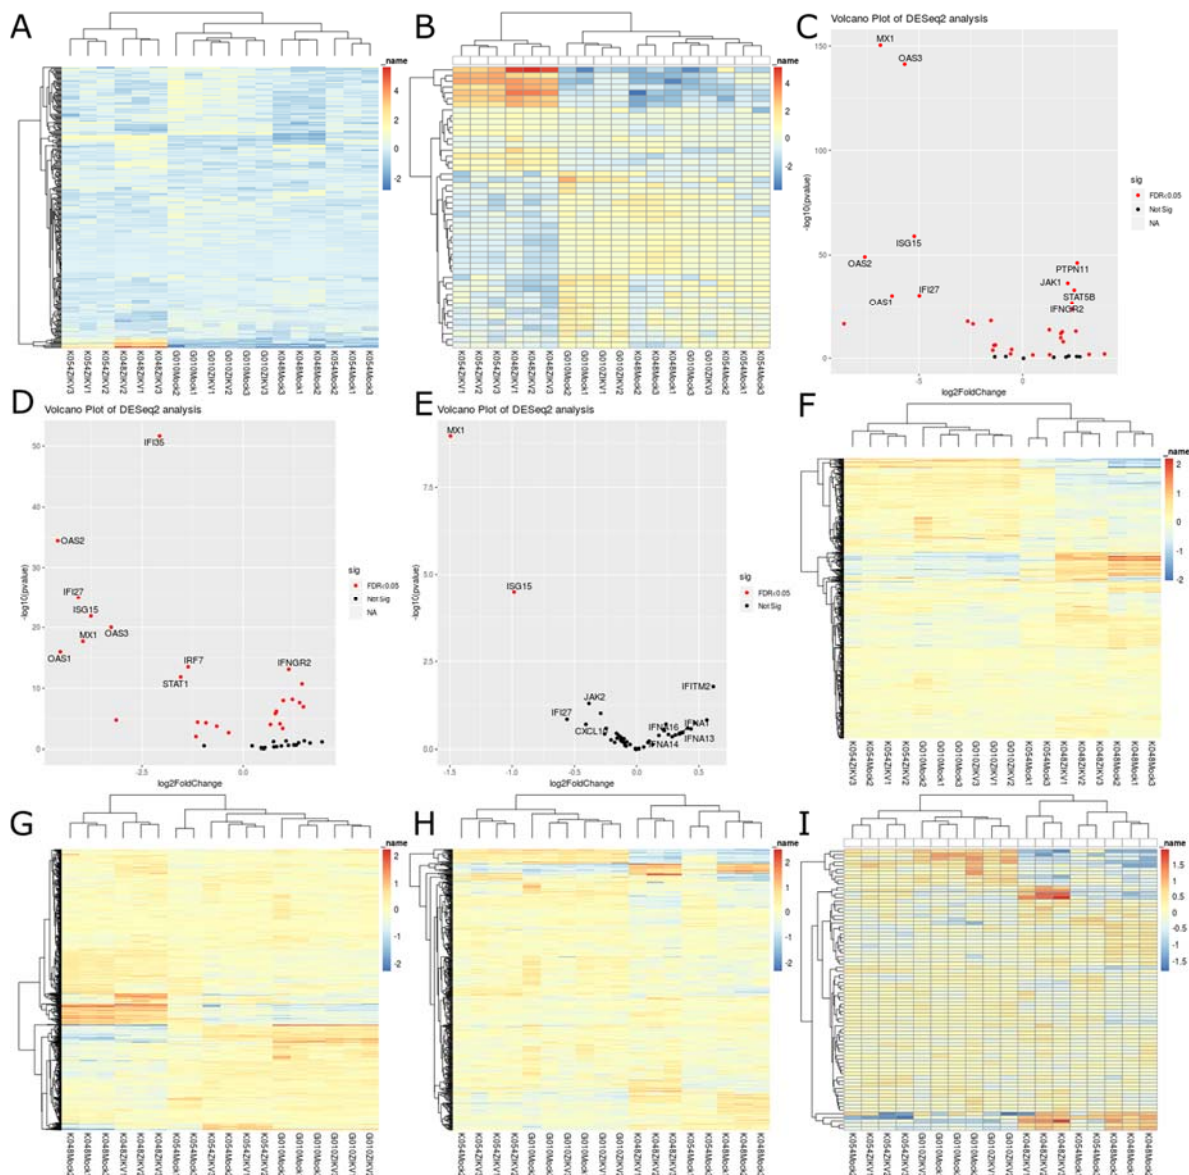

591

592

593 Figure 4: Results of AIDD pathway expression analysis. (A) Gene Ontology term “innate immune  
 594 system” shows clustering of ZIKV infected cells with the CSZ phenotype (K048 & K054) and  
 595 clustering of normal phenotype (G010) with the mock infected cells of all 3 cell lines. (B)  
 596 Customized “interferon alpha pathway” list shows similar clustering pattern as (A). The CZS  
 597 phenotype cell lines (K048 & K054) show the top 10 differentially expressed genes with gene  
 598 products induced by interferon alpha pathway, including OAS1 and 2, and intermediary genes in the

599 interferon alpha pathway, including STAT1 (C & D, respectively). On the other hand,  
600 phenotypically normal cell line (G010) has only 2 differentially expressed genes, which are not part  
601 of the interferon alpha pathway (E). Gene ontology terms “brain development” (F), “CNS  
602 development” (G), “neurological development” (H), and “PNS development” (I) exhibit differential  
603 expression patterns that can be attributed to genetic differences among cell lines, but not associated  
604 with ZIKV infection.  
605  
606



607

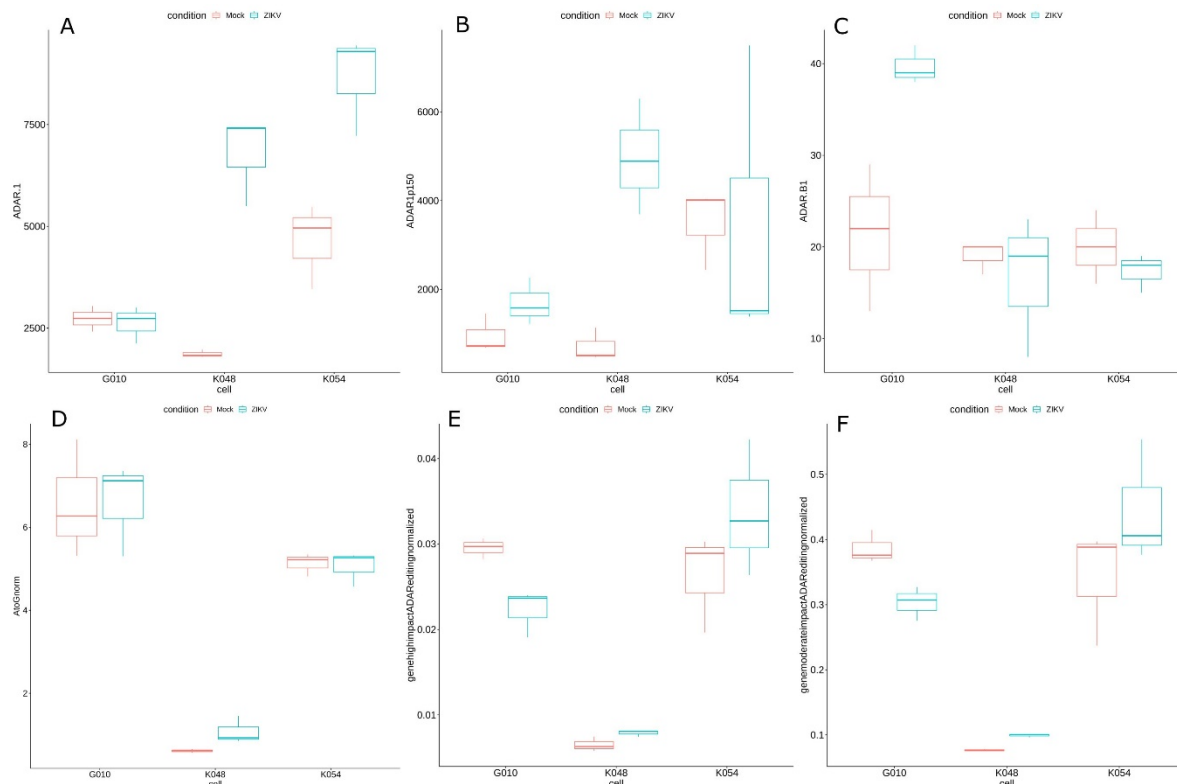

608

609

610 Figure 5: Visualization of ADAR expression and ADAR editing landscapes. (A) ADAR expression  
 611 is significantly increased in CZS phenotype cell lines K048 ( $F=58.396$ ,  $p=0.001575$ ) and K054  
 612 ( $F=18.516$ ,  $p=0.01261$ ), but not in phenotypically normal G010 ( $F=0.1219$ ,  $p=0.7446$ ) cells. (B)  
 613 ADAR1p150 expression is significantly higher in K048 ( $F=29.497$ ,  $p=0.005576$ ), but not in K054  
 614 ( $F=2e-04$ ,  $p=0.9902$ ) or G010 ( $F=3.4772$ ,  $p=0.1357$ ) cells. (C) ADARB1 expression is not  
 615 significantly different in K048 ( $F=0.2579$ ,  $p=0.6383$ ) or K054 ( $F=1.0492$ ,  $p=0.3636$ ) cells, but is  
 616 significantly higher in G010 ( $F=14.684$ ,  $p=0.01859$ ). (D) The numbers of A to G substitutions were  
 617 somewhat elevated in K048 ( $F=6.0422$ ,  $p=0.06984$ ), but not in G010 ( $F=6e-04$ ,  $p=0.9813$ ) or K054  
 618 cells ( $F=0.0648$ ,  $p=0.8116$ ). (E) The numbers of A to G substitutions with predicted high impact on  
 619 protein structure and function were significantly lower in G010 ( $F=17.498$ ,  $p=0.01388$ ), but  
 620 somewhat higher in K048 cells ( $F=6.3489$ ,  $p=0.06538$ ); there were no changes in K054 cells  
 621 ( $F=1.7384$ ,  $p=0.2578$ ). Likewise, moderate impact substitutions were also significantly lower in  
 622 G010 ( $F=15.737$ ,  $p=0.01658$ ) and significantly higher in K048 ( $F=157.23$ ,  $p=0.0002328$ ) cells,  
 623 while were not changed in K054 cells ( $F=1.9198$ ,  $p=0.2381$ ) (F).

624 Supplementary Tables are available at GitHub,  
625 [https://github.com/RNAdetective/AIDD/tree/master/AIDD\\_supplFiles.ST1-8\\_and\\_SF1](https://github.com/RNAdetective/AIDD/tree/master/AIDD_supplFiles.ST1-8_and_SF1)  
626

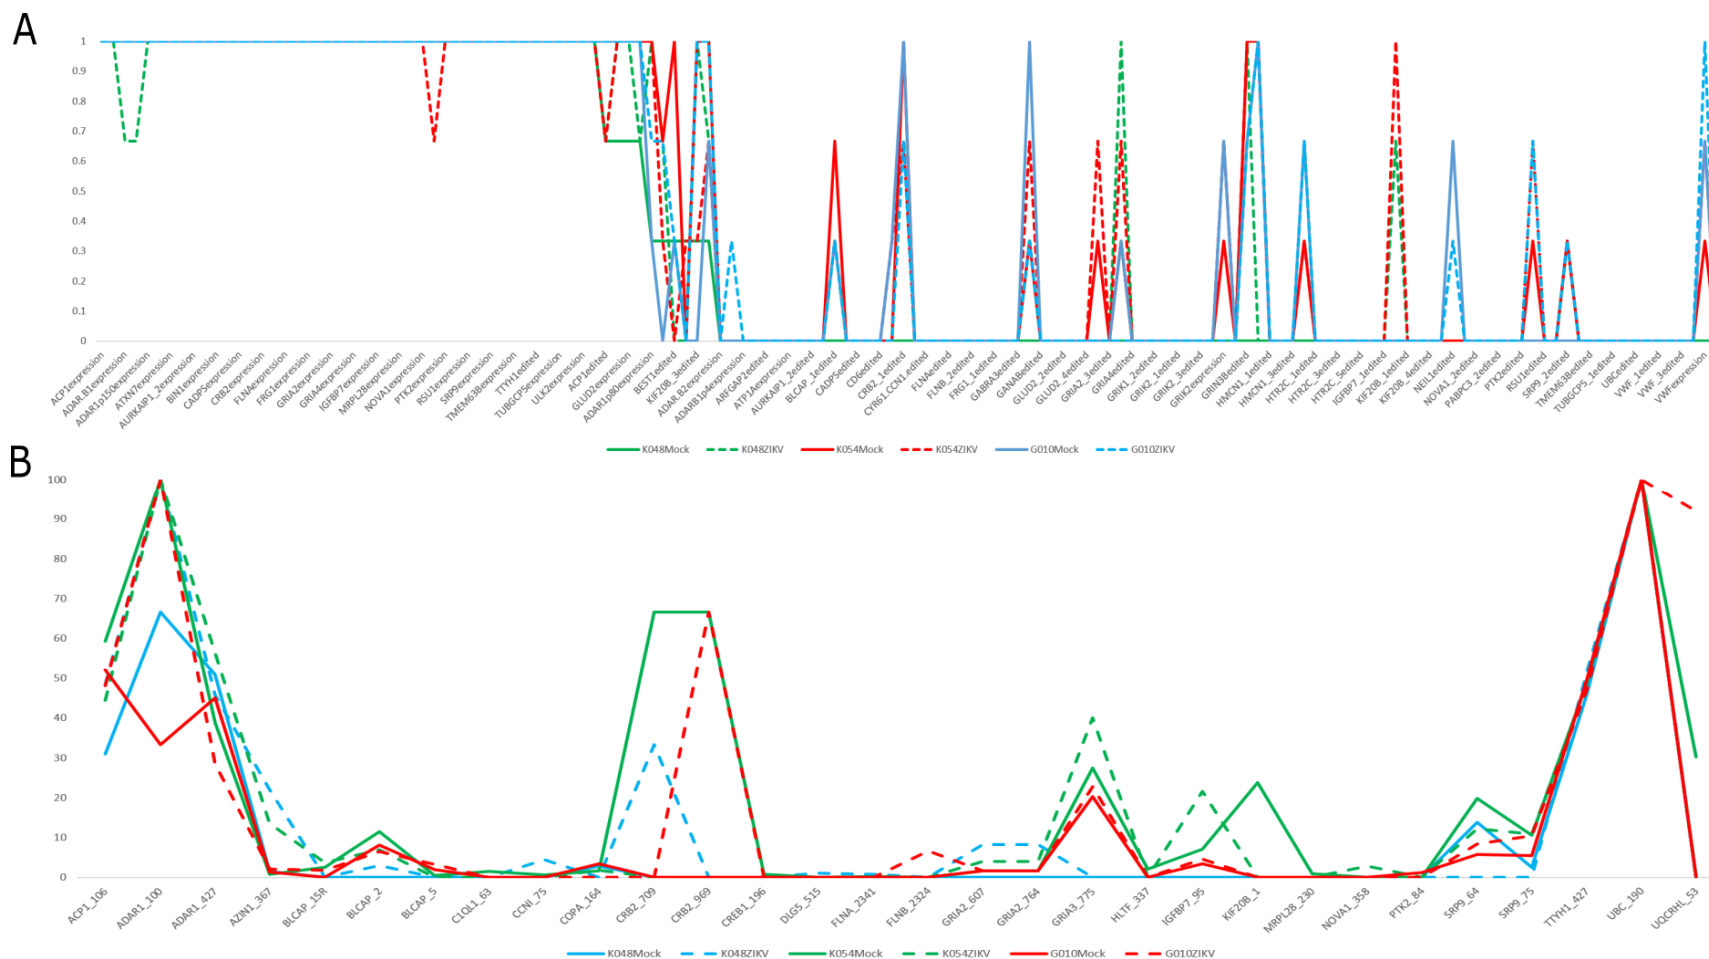

Supplementary Figure 1: Guttman scale patterns (Proctor 1970) were used to order and group ADAR editing sites based on the frequency of samples that had editing at those sites. ADAR editing landscapes are differentially edited in both order and groupings based on cell line and ZIKV infection. (A) The expression and editing events are ordered by normal phenotype cell line G010 shown in blue, with cell lines K048 and K054 shown in green and red, respectively. The mock-infected cells are shown with solid lines and ZIKV-infected cells are shown with dashed lines. (B) The mean editing frequencies differ between mock- and ZIKV-infected cells at several sites including; (i) AZIN1 at amino acid position 367 ( $F=7.1095$ ,  $p=0.00263$ ), (ii) CRB2 at amino acid position 969 ( $F=3.2$ ,  $p=0.04584$ ), (iii) IGFBP7 at amino acid position 95 ( $F=40.651$ ,  $p=4.09e-07$ ), (iv) SRP9 at amino acid position 75 ( $F=3.5131$ ,  $p=0.03459$ ), and (v) UQCRHL at amino acid position 53 ( $F=8.796$ ,  $p=0.00105$ ). Changes in editing patterns were also detected at ADAR1 at amino acid position 427 ( $F=2.9571$ ,  $p=0.05749$ ), CCN1 at amino acid position 75 ( $F=2.5546$ ,  $p=0.08504$ ), and GRIA3 at amino acid position 775 ( $F=2.5515$ ,  $p=0.08531$ ), respectively.
